# Supplementary material for: Ambient Air Pollution and Daily Outpatient Visits for Cardiac Arrhythmia in Shanghai, China
Source: PubMed Central journal article supplement (PMC4074637; doi:10.2188/jea.je20140030), 2014-07-05
Supplement: je-24-321-s001.pdf [file je-24-321-s001.pdf]

**eTable 1.** Summary statistics of air pollutant concentrations and weather conditions

|        | PM <sub>10</sub> (µg/m <sup>3</sup> ) | SO <sub>2</sub> (µg/m <sup>3</sup> ) | NO <sub>2</sub> (µg/m <sup>3</sup> ) | Temperature (°C) | Humidity (%) |
|--------|---------------------------------------|--------------------------------------|--------------------------------------|------------------|--------------|
| Total  | 81±63                                 | 29±18                                | 54±23                                | 17±9             | 68±13        |
| Spring | 96±83                                 | 30±15                                | 56±20                                | 15±6             | 64±16        |
| Summer | 61±35                                 | 19±9                                 | 43±19                                | 28±3             | 74±9         |
| Autumn | 74±62                                 | 24±14                                | 54±26                                | 20±5             | 70±11        |
| Winter | 92±54                                 | 44±22                                | 63±25                                | 6±4              | 66±13        |

Values are reported as mean±standard deviation

Spring: from March to May

Summer: from June to August

Autumn: from September to November

Winter: from December to February
