# Supplementary material for: Ambient Air Pollution and Daily Outpatient Visits for Cardiac Arrhythmia in Shanghai, China
Source: PubMed Central journal article supplement (PMC4074637; doi:10.2188/jea.je20140030), 2014-07-05
Supplement: je-24-321-s002.pdf [file je-24-321-s002.pdf]

**Table 2.** Pearson correlation coefficients between daily air pollutant concentrations and weather conditions in Metropolitan Shanghai (2010-2011).

|                  | SO <sub>2</sub> | NO <sub>2</sub> | Temperature | Humidity |
|------------------|-----------------|-----------------|-------------|----------|
| PM <sub>10</sub> | 0.54            | 0.57            | -0.18       | -0.33    |
| SO <sub>2</sub>  |                 | 0.71            | -0.54       | -0.40    |
| NO <sub>2</sub>  |                 |                 | -0.33       | -0.19    |
| Temperature      |                 |                 |             | 0.23     |
