# Supplementary material for: Ambient Air Pollution and Daily Outpatient Visits for Cardiac Arrhythmia in Shanghai, China
Source: PubMed Central journal article supplement (PMC4074637; doi:10.2188/jea.je20140030), 2014-07-05
Supplement: je-24-321-s003.pdf [file je-24-321-s003.pdf]

**eTable 3.** Percent increase in number of daily outpatient visits for arrhythmia associated with an interquartile range increase\* of pollutant concentrations using different lag days in single-pollutant models

| Lag | PM <sub>10</sub>   | SO <sub>2</sub>   | NO <sub>2</sub>  |
|-----|--------------------|-------------------|------------------|
| 0   | 3.03 (2.28,3.77)   | 4.34 (3.13,5.54)  | 8.81 (7.70,9.93) |
| 1   | -0.58 (-1.35,0.19) | 1.12 (-0.01,2.25) | 3.34 (2.18,4.51) |
| 2   | -0.05(-0.79,0.68)  | 0.48 (-0.61,1.57) | 0.42(-0.72,1.56) |
| 02† | 0.95 (0.01,1.89)   | 2.66(1.23,4.09)   | 6.91(5.48,8.33)  |

Values are reported as means and 95% confidence intervals.

\* The interquartile range concentrations of PM<sub>10</sub>, SO<sub>2</sub>, and NO<sub>2</sub> were 54 µg/m<sup>3</sup>, 21 µg/m<sup>3</sup>, and 30 µg/m<sup>3</sup>, respectively.

† Lag day 02 refers to the 3-day-moving average concentrations.
